# Supplementary material for: Errors associated with calculating the gross nitrification rates in forested catchments using the triple oxygen isotopic composition (Δ 17 O) of stream nitrate
Source: Copernicus journal article supplement (doi:10.5194/egusphere-2023-2753), 2023-12-12
Supplement: Supplementary file 1 [file egusphere-2023-2753-supplement.pdf]

**Table S1.**  $\Delta^{17}\text{O}$  values of  $\text{NO}_3^-$ , leaching flux of  $\text{NO}_3^-$ , total metabolic rate of  $\text{NO}_3^-$  (GDR + uptake), and GNR in the simulated forested soil where the distribution of  $\Delta^{17}\text{O}$  values of  $\text{NO}_3^-$  is heterogeneous.

| Depth<br>layer | $\Delta^{17}\text{O}$<br>‰ | $\text{NO}_3^-$ flux | kg of N ha <sup>-1</sup> y <sup>-1</sup> |     |
|----------------|----------------------------|----------------------|------------------------------------------|-----|
|                |                            |                      | GDR+uptake                               | GNR |
| 0              | 28.0                       | 7.0                  | 0.0                                      | 0.0 |
| 1              | 25.4                       | 6.6                  | 1.2                                      | 0.7 |
| 2              | 22.8                       | 6.1                  | 1.2                                      | 0.7 |
| 3              | 20.2                       | 5.7                  | 1.2                                      | 0.8 |
| 4              | 17.7                       | 5.2                  | 1.3                                      | 0.8 |
| 5              | 15.1                       | 4.8                  | 1.3                                      | 0.9 |
| 6              | 12.5                       | 4.4                  | 1.4                                      | 1.0 |
| 7              | 9.9                        | 3.9                  | 1.6                                      | 1.1 |
| 8              | 7.3                        | 3.5                  | 1.8                                      | 1.4 |
| 9              | 4.7                        | 3.0                  | 2.3                                      | 1.9 |
| 10             | 2.2                        | 2.6                  | 4.1                                      | 3.6 |
| 11             | 2.2                        | 2.6                  | 0.0                                      | 0.0 |

**Table S2.**  $\Delta^{17}\text{O}$  values of  $\text{NO}_3^-$ , leaching flux of  $\text{NO}_3^-$ , total metabolic rate of  $\text{NO}_3^-$  (GDR + uptake), and GNR in the simulated forested soil where the distribution of  $\Delta^{17}\text{O}$  values of  $\text{NO}_3^-$  is homogeneous.

| Depth<br>layer | $\Delta^{17}\text{O}$<br>‰ | $\text{NO}_3^-$ flux | kg of N ha <sup>-1</sup> y <sup>-1</sup> |      |
|----------------|----------------------------|----------------------|------------------------------------------|------|
|                |                            |                      | GDR+uptake                               | GNR  |
| 0              | 28.0                       | 7.0                  | 0.0                                      | 0.0  |
| 1              | 2.2                        | 6.6                  | 84.0                                     | 83.6 |
| 2              | 2.2                        | 6.1                  | 0.4                                      | 0.0  |
| 3              | 2.2                        | 5.7                  | 0.4                                      | 0.0  |
| 4              | 2.2                        | 5.2                  | 0.4                                      | 0.0  |
| 5              | 2.2                        | 4.8                  | 0.4                                      | 0.0  |
| 6              | 2.2                        | 4.4                  | 0.4                                      | 0.0  |
| 7              | 2.2                        | 3.9                  | 0.4                                      | 0.0  |
| 8              | 2.2                        | 3.5                  | 0.4                                      | 0.0  |
| 9              | 2.2                        | 3.0                  | 0.4                                      | 0.0  |
| 10             | 2.2                        | 2.6                  | 0.4                                      | 0.0  |
| 11             | 2.2                        | 2.6                  | 0.0                                      | 0.0  |
